# Supplementary material for: Chromeno-carbonitriles as corrosion inhibitors for mild steel in acidic solution: electrochemical, surface and computational studies
Source: Royal Society of Chemistry journal article supplement (doi:10.1039/d0ra07595g), 2021-01-01
Supplement: d0ra07595g1.pdf [file d0ra07595g1.pdf]

## SUPPORTING INFORMATION

### Chromeno-carbonitriles as Corrosion Inhibitors for Mild Steel in Acidic Solution: Electrochemical, Surface and Computational Studies

Taiwo W. Quadri<sup>1</sup>, Lukman O. Olasunkanmi<sup>1,2</sup>, Ekemini D. Akpan<sup>1</sup>, Akram Al Fantazi<sup>3</sup>, I. B. Obot<sup>4</sup>, Chandrabhan Verma<sup>4\*</sup>, Amal M. Al-Mohaimed<sup>5</sup>, Eno E. Ebenso<sup>1,6</sup> and M. A. Quraishi<sup>4</sup>

<sup>1</sup>Materials Science Innovation and Modelling (MaSIM) Research Focus Area, Faculty of Natural and Agricultural Sciences, North-West University (Mafikeng Campus), Private Bag X2046, Mmabatho 2735, South Africa

<sup>2</sup>Department of Chemistry, Faculty of Science, Obafemi Awolowo University, Ile-Ife 220005, Nigeria

<sup>3</sup>Department of Chemical Engineering, Khalifa University of Science and Technology, P.O. Box 2533, Abu Dhabi, United Arab Emirates

<sup>4</sup>Center of Research Excellence in Corrosion, Research Institute, King Fahd University of Petroleum and Minerals, Dhahran 31261, Saudi Arabia

<sup>5</sup>Department of Chemistry, College of Science, King Saud University, P.O. Box 22452, Riyadh 11495, Saudi Arabia

<sup>6</sup>Institute for Nanotechnology and Water Sustainability, College of Science, Engineering and Technology, University of South Africa, Johannesburg, South Africa

\*Corresponding author's emails: [cbverma38@gmail.com](mailto:cbverma38@gmail.com), [chandrabhan.verma@itbhu.ac.in](mailto:chandrabhan.verma@itbhu.ac.in) (CV).

**Table S11** Mulliken charges of INH-1, INH-2 and INH-3 molecules

#### INH-1

| Atoms | qN     | qN+1   | qN-1    | fk+    | fk-    |
|-------|--------|--------|---------|--------|--------|
| C1    | -0.049 | -0.160 | -0.0586 | -0.111 | 0.009  |
| C2    | -0.062 | -0.198 | -0.2035 | -0.136 | 0.142  |
| C3    | -0.047 | -0.544 | -0.3984 | -0.497 | 0.351  |
| C4    | -0.028 | 0.120  | 0.0836  | 0.148  | -0.112 |
| C5    | 0.011  | 0.286  | 0.3709  | 0.274  | -0.359 |
| C6    | -0.070 | -0.368 | -0.3827 | -0.297 | 0.312  |
| C7    | 0.182  | 0.221  | 0.2972  | 0.039  | -0.115 |

|     |        |        |         |        |        |
|-----|--------|--------|---------|--------|--------|
| C8  | 0.191  | 0.121  | 0.1189  | -0.070 | 0.072  |
| C9  | 0.015  | 0.258  | 0.1236  | 0.243  | -0.108 |
| C10 | -0.208 | -0.415 | -0.1805 | -0.207 | -0.028 |
| O11 | -0.200 | -0.562 | -0.3124 | -0.362 | 0.113  |
| C12 | -0.087 | 0.486  | 0.6290  | 0.572  | -0.716 |
| C13 | 0.300  | 0.743  | 0.7054  | 0.443  | -0.405 |
| O14 | -0.241 | -0.349 | -0.2632 | -0.108 | 0.022  |
| C15 | 0.154  | 0.123  | 0.0128  | -0.031 | 0.141  |
| C16 | -0.060 | 0.797  | 0.9004  | 0.858  | -0.961 |
| C17 | -0.116 | -0.930 | -0.7422 | -0.815 | 0.627  |
| C18 | 0.056  | 0.222  | 0.0333  | 0.166  | 0.023  |
| C19 | -0.130 | -0.544 | -0.3702 | -0.414 | 0.240  |
| C20 | 0.189  | -0.206 | -0.3654 | -0.395 | 0.554  |
| O21 | -0.236 | -0.347 | -0.2771 | -0.111 | 0.041  |
| N22 | -0.415 | -0.652 | -0.5280 | -0.237 | 0.113  |
| C23 | -0.172 | -0.413 | -0.3158 | -0.241 | 0.144  |
| C24 | -0.177 | -0.534 | -0.4627 | -0.357 | 0.286  |
| C25 | 0.050  | -0.081 | -0.1351 | -0.130 | 0.185  |
| N26 | -0.215 | -0.574 | -0.3953 | -0.359 | 0.180  |

## INH-2

| Atoms | qN     | qN+1   | qN-1   | fk+    | fk-    |
|-------|--------|--------|--------|--------|--------|
| C1    | -0.074 | -0.159 | -0.110 | -0.085 | 0.036  |
| C2    | -0.048 | -0.244 | -0.201 | -0.196 | 0.153  |
| C3    | -0.084 | -0.474 | -0.412 | -0.390 | 0.328  |
| C4    | 0.126  | -0.369 | -0.360 | -0.495 | 0.486  |
| C5    | -0.016 | 0.904  | 0.975  | 0.920  | -0.991 |
| C6    | -0.057 | -0.497 | -0.508 | -0.439 | 0.451  |
| N7    | -0.363 | -0.331 | -0.234 | 0.032  | -0.128 |
| C8    | 0.316  | 0.136  | 0.111  | -0.180 | 0.205  |
| O9    | -0.281 | -0.460 | -0.324 | -0.180 | 0.043  |
| C10   | 0.020  | 0.163  | -0.068 | 0.143  | 0.087  |
| C11   | -0.083 | 0.447  | 0.783  | 0.530  | -0.866 |
| C12   | 0.299  | 0.778  | 0.742  | 0.480  | -0.443 |
| O13   | -0.242 | -0.378 | -0.297 | -0.137 | 0.056  |
| C14   | 0.154  | 0.104  | -0.027 | -0.049 | 0.181  |
| C15   | -0.057 | 0.620  | 0.780  | 0.677  | -0.837 |
| C16   | -0.115 | -0.925 | -0.649 | -0.809 | 0.533  |
| C17   | 0.056  | 0.428  | 0.093  | 0.372  | -0.037 |
| C18   | -0.130 | -0.608 | -0.362 | -0.478 | 0.232  |
| C19   | 0.190  | -0.029 | -0.239 | -0.219 | 0.429  |
| O20   | -0.233 | -0.480 | -0.312 | -0.247 | 0.079  |

|     |        |        |        |        |       |
|-----|--------|--------|--------|--------|-------|
| N21 | -0.415 | -0.681 | -0.545 | -0.266 | 0.130 |
| C22 | -0.172 | -0.467 | -0.335 | -0.295 | 0.163 |
| C23 | -0.177 | -0.577 | -0.463 | -0.400 | 0.287 |
| C24 | 0.053  | 0.061  | -0.047 | 0.008  | 0.100 |
| N25 | -0.217 | -0.632 | -0.431 | -0.414 | 0.214 |

### INH-3

| Atoms | qN     | qN+1   | qN-1   | fk+    | fk-    |
|-------|--------|--------|--------|--------|--------|
| C1    | -0.088 | -0.129 | -0.060 | -0.041 | -0.028 |
| C2    | -0.057 | -0.053 | -0.069 | 0.004  | 0.012  |
| C3    | -0.585 | -0.628 | -0.526 | -0.043 | -0.060 |
| C4    | 0.204  | 0.219  | 0.212  | 0.015  | -0.008 |
| C5    | -0.181 | -0.181 | -0.188 | -0.001 | 0.007  |
| C6    | 0.578  | 0.547  | 0.614  | -0.031 | -0.035 |
| C7    | 0.056  | -0.034 | 0.118  | -0.090 | -0.062 |
| C8    | -0.345 | -0.326 | -0.329 | 0.019  | -0.016 |
| C9    | -0.366 | -0.452 | -0.354 | -0.086 | -0.012 |
| C10   | 0.127  | 0.146  | 0.170  | 0.018  | -0.043 |
| C11   | 0.468  | 0.526  | 0.405  | 0.058  | 0.063  |
| O12   | -0.259 | -0.264 | -0.199 | -0.005 | -0.061 |
| C13   | 0.469  | 0.392  | 0.477  | -0.078 | -0.008 |
| C14   | 0.400  | 0.133  | 0.504  | -0.267 | -0.104 |
| C15   | 0.629  | 0.704  | 0.591  | 0.075  | 0.038  |
| O16   | -0.499 | -0.579 | -0.472 | -0.080 | -0.027 |
| C17   | -0.417 | -0.333 | -0.538 | 0.084  | 0.121  |
| C18   | 0.777  | 0.819  | 0.877  | 0.042  | -0.100 |
| C19   | -0.804 | -0.900 | -0.708 | -0.096 | -0.096 |
| C20   | 0.297  | 0.372  | 0.181  | 0.074  | 0.116  |
| C21   | -0.210 | -0.220 | -0.178 | -0.010 | -0.032 |
| C22   | -0.156 | -0.200 | -0.181 | -0.044 | 0.026  |
| O23   | -0.443 | -0.464 | -0.338 | -0.021 | -0.106 |
| N24   | -0.548 | -0.587 | -0.518 | -0.040 | -0.030 |
| C25   | -0.444 | -0.489 | -0.402 | -0.045 | -0.042 |
| C26   | -0.532 | -0.564 | -0.486 | -0.031 | -0.046 |
| C27   | -0.621 | -0.553 | -0.633 | 0.068  | 0.013  |
| N28   | -0.511 | -0.639 | -0.442 | -0.128 | -0.070 |

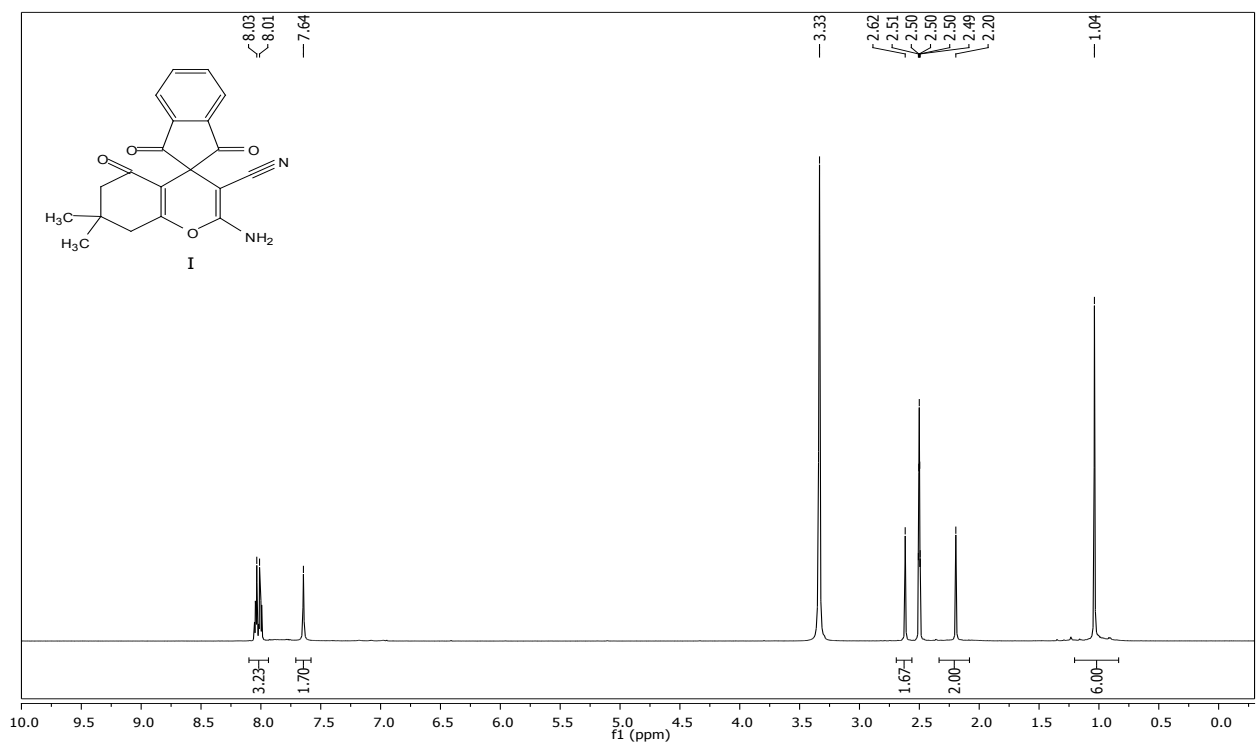

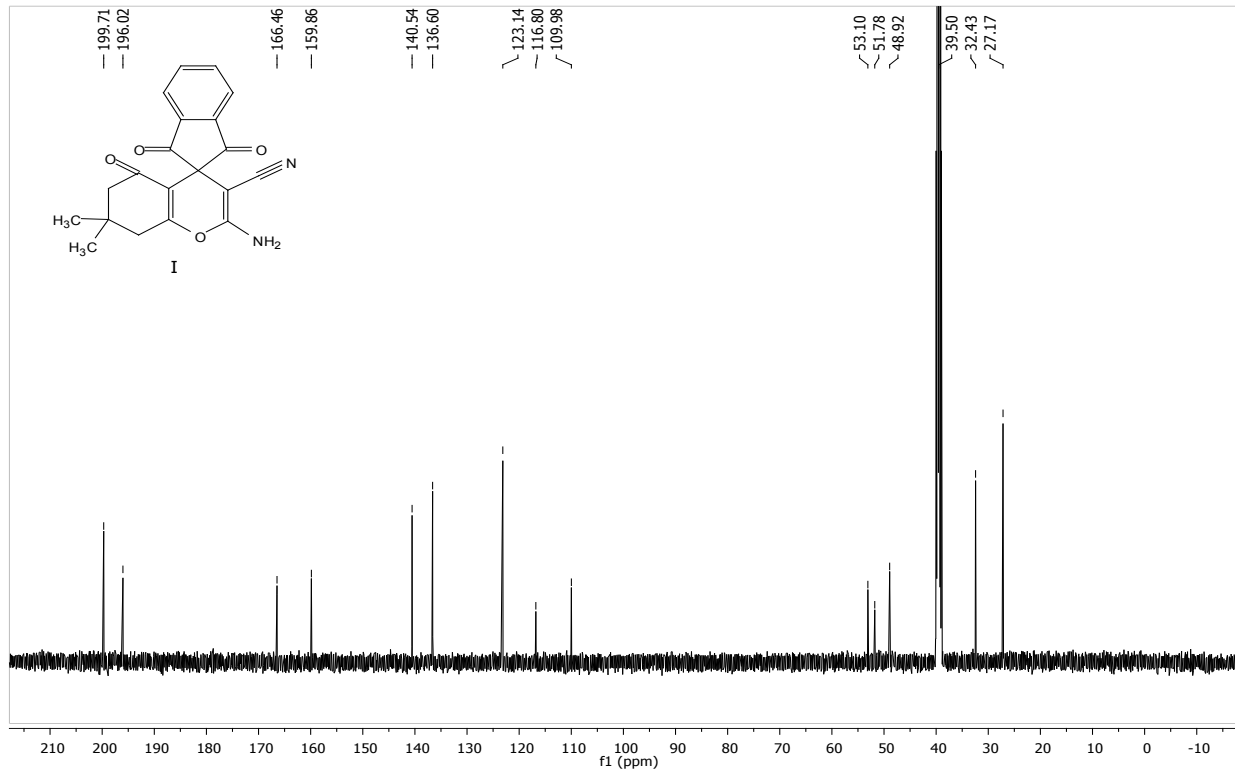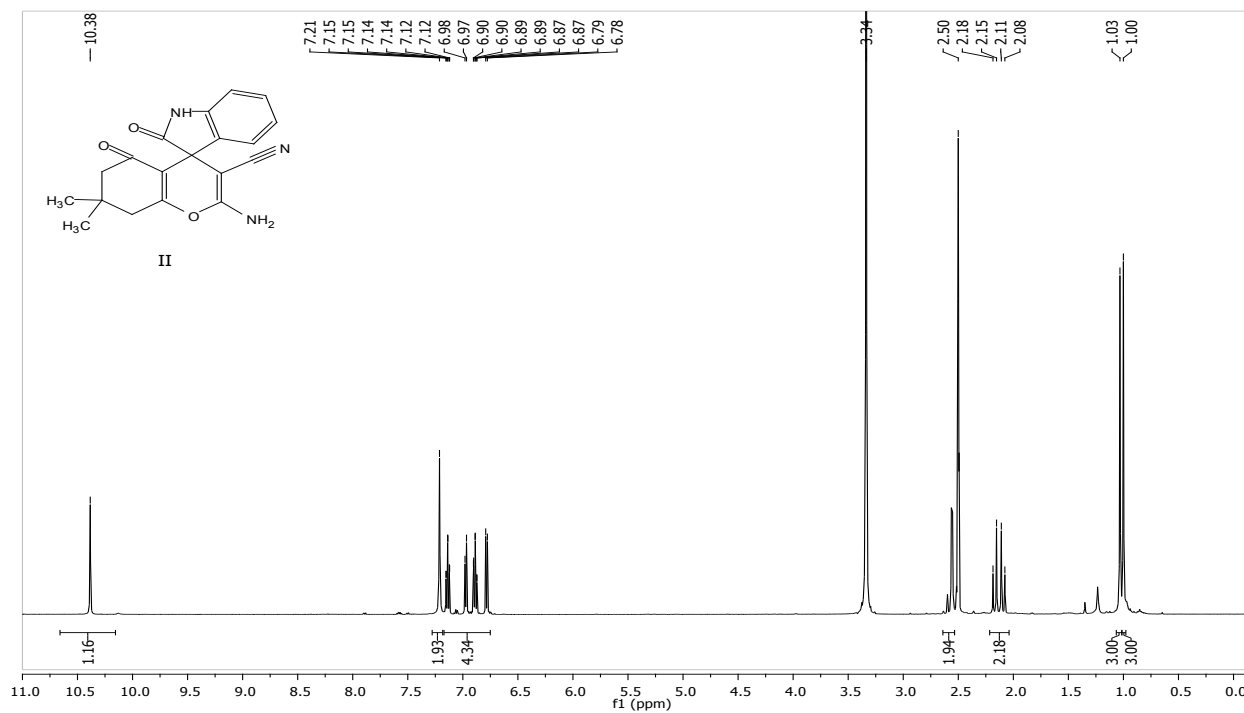

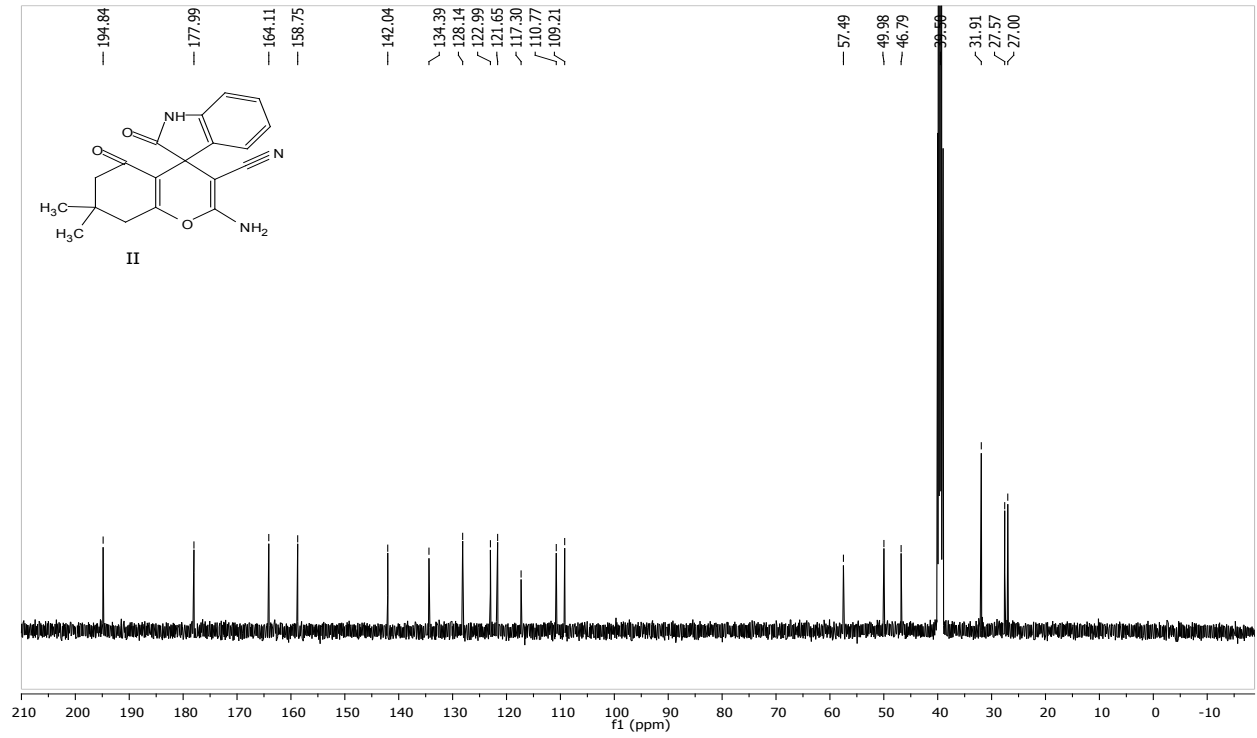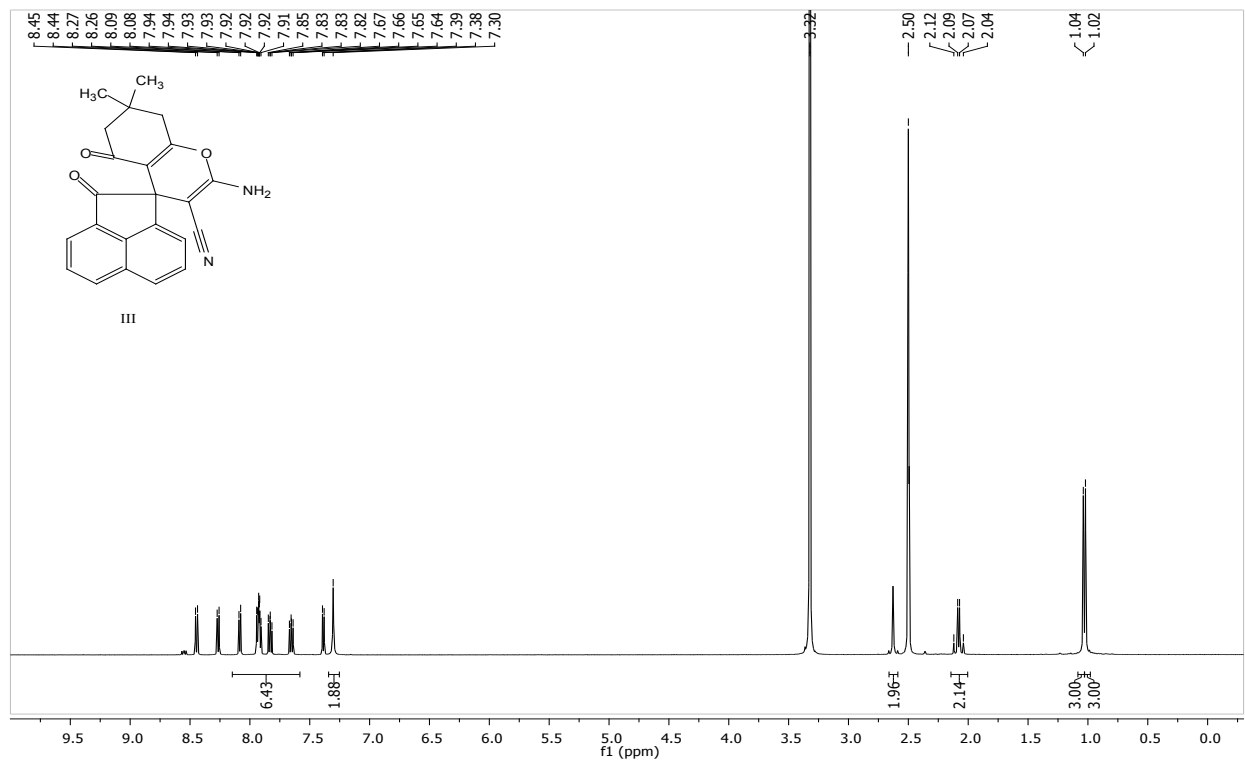

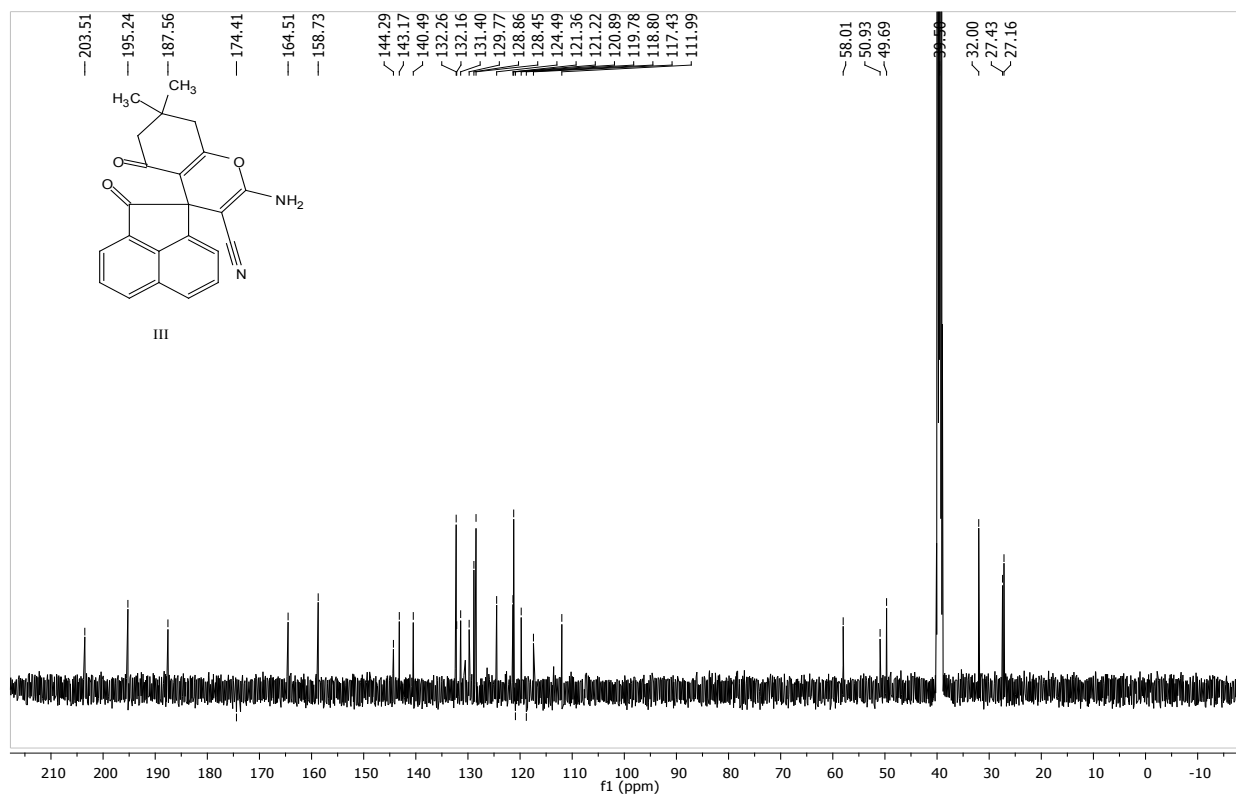

**Fig. S1**  $^1\text{H}$  and  $^{13}\text{C}$  NMR spectra of INH-1, INH-2 and INH-3 molecules.
